# Supplementary material for: Evaluating Serum Markers for Hormone Receptor-Negative Breast Cancer
Source: PubMed Central journal article supplement (PMC4643893; doi:10.1371/journal.pone.0142911), 2015-11-13

**CCL5 (RANTES)**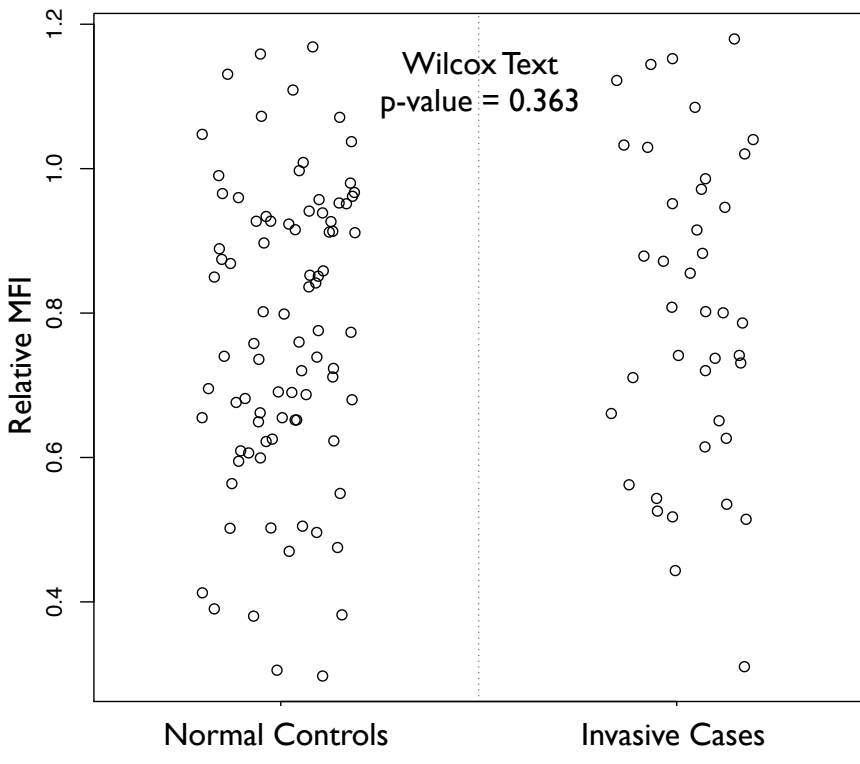**COL1A1**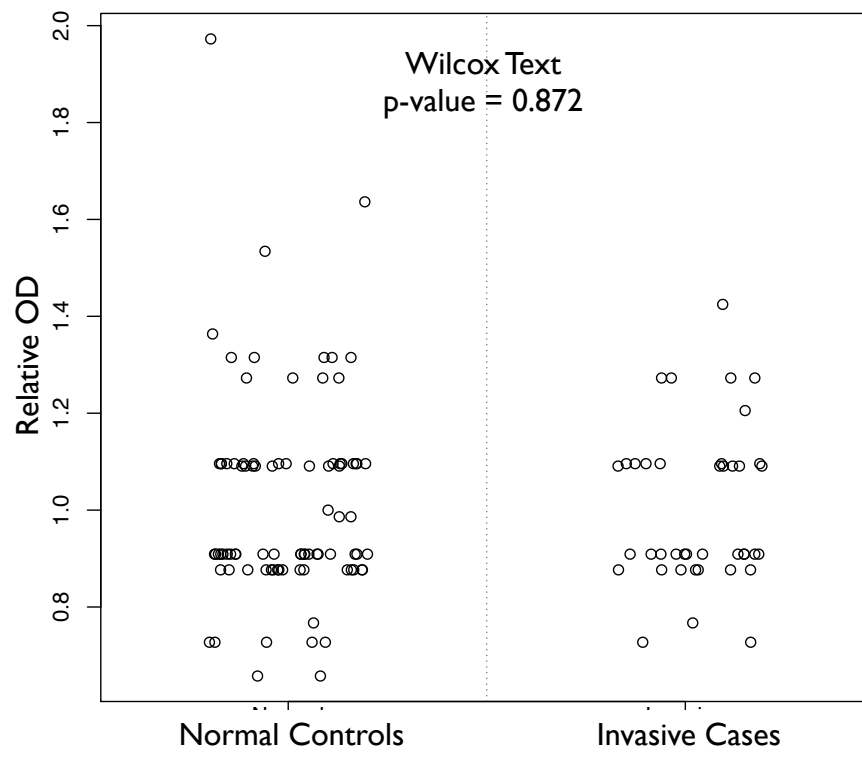**CTGF**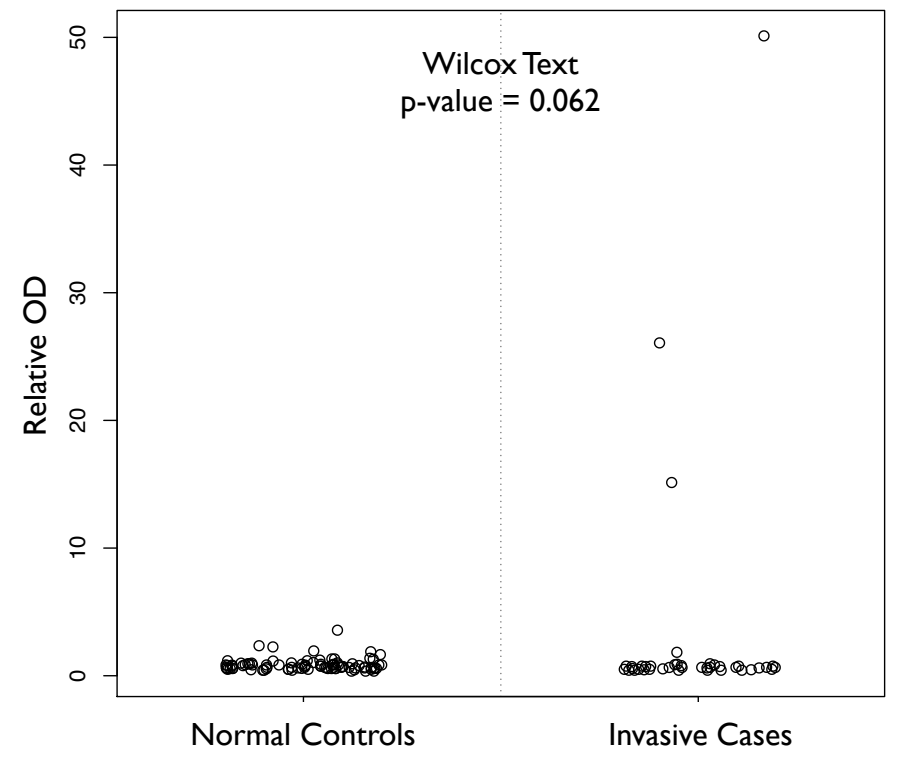**FNI**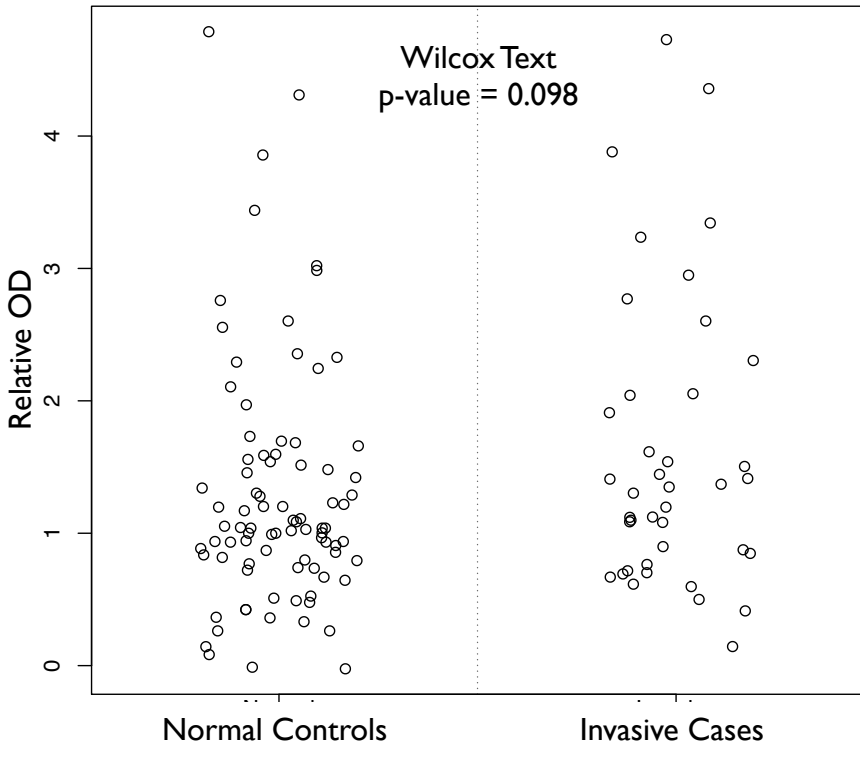**GDF15 (MICI)**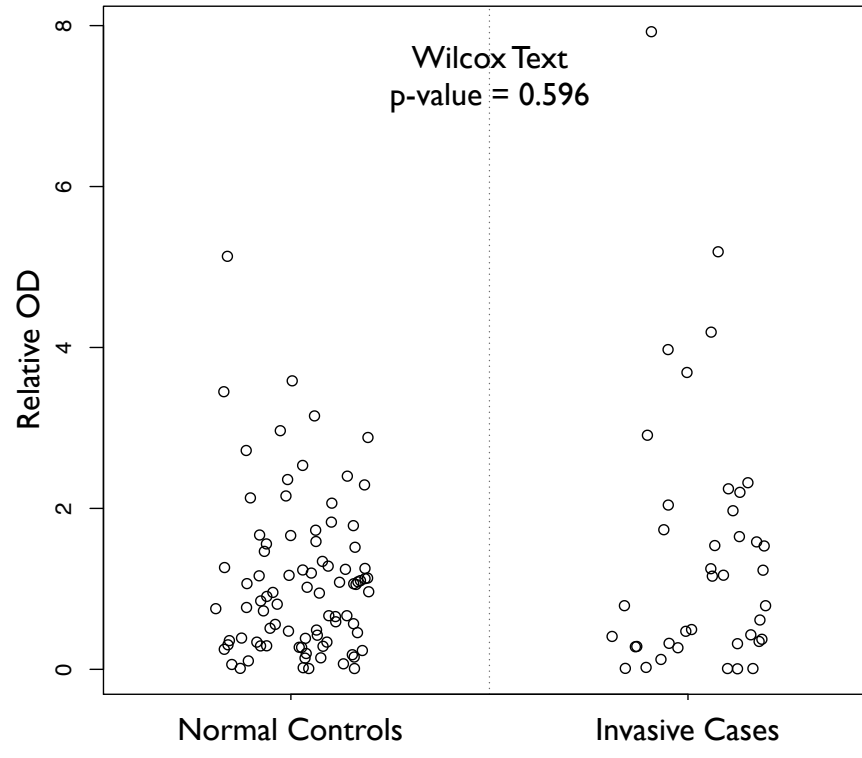**HOXA5**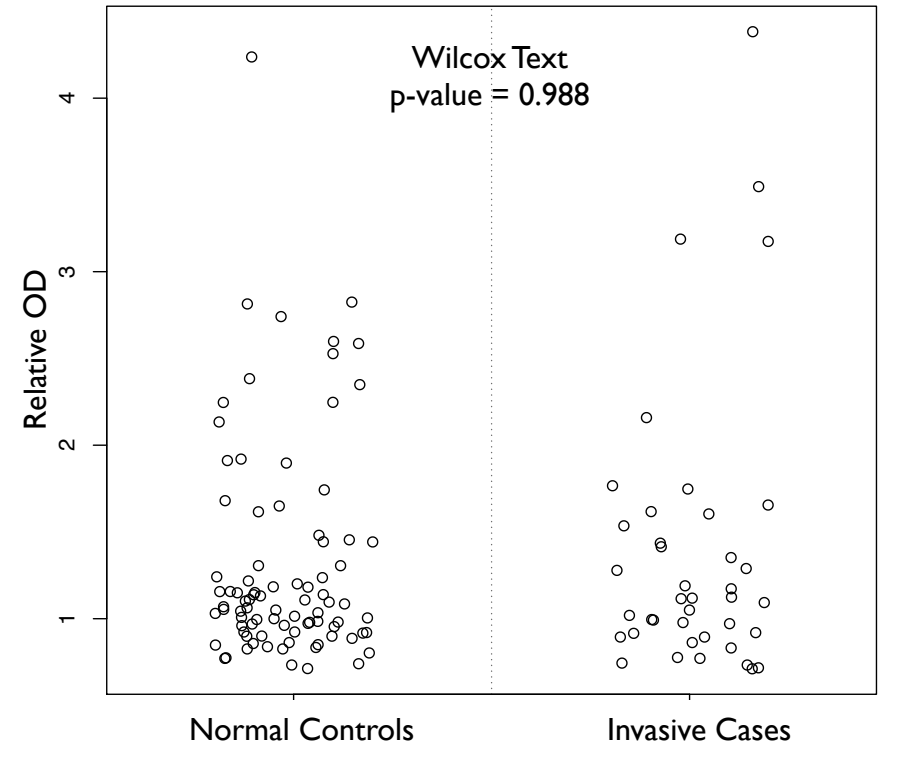**PKM (reversed)**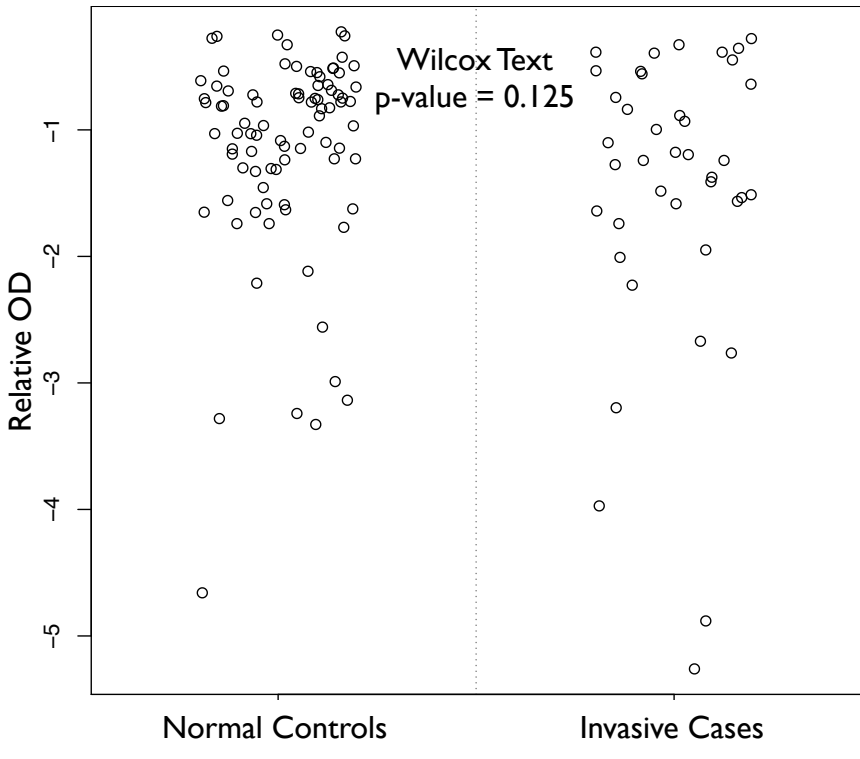**SI00A7 (Psoriasis)**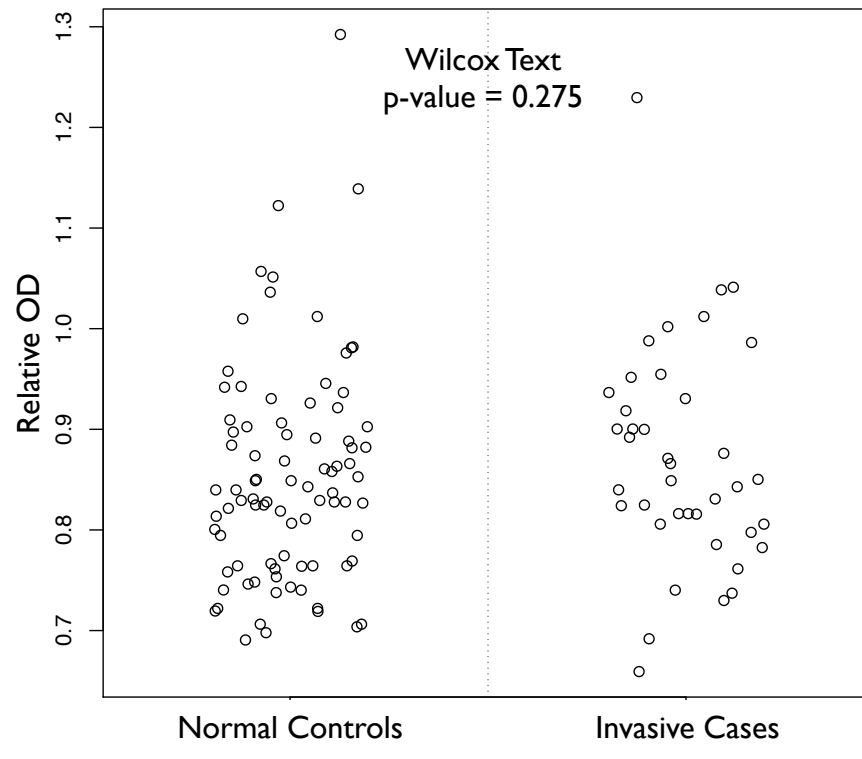**SFRP1**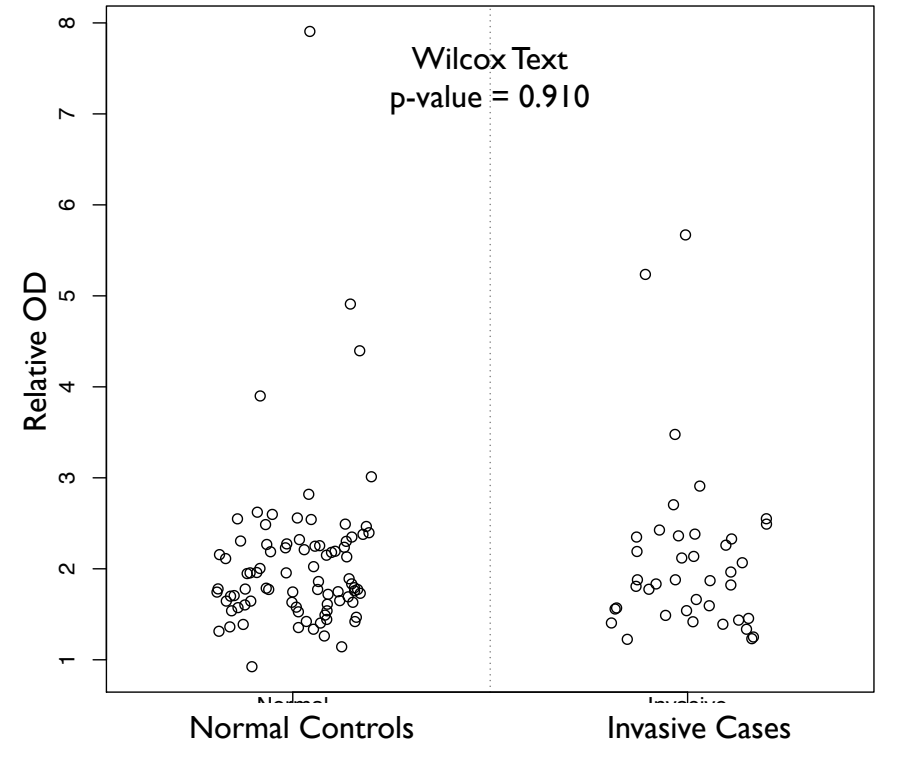**SPARC (Osteonectin)**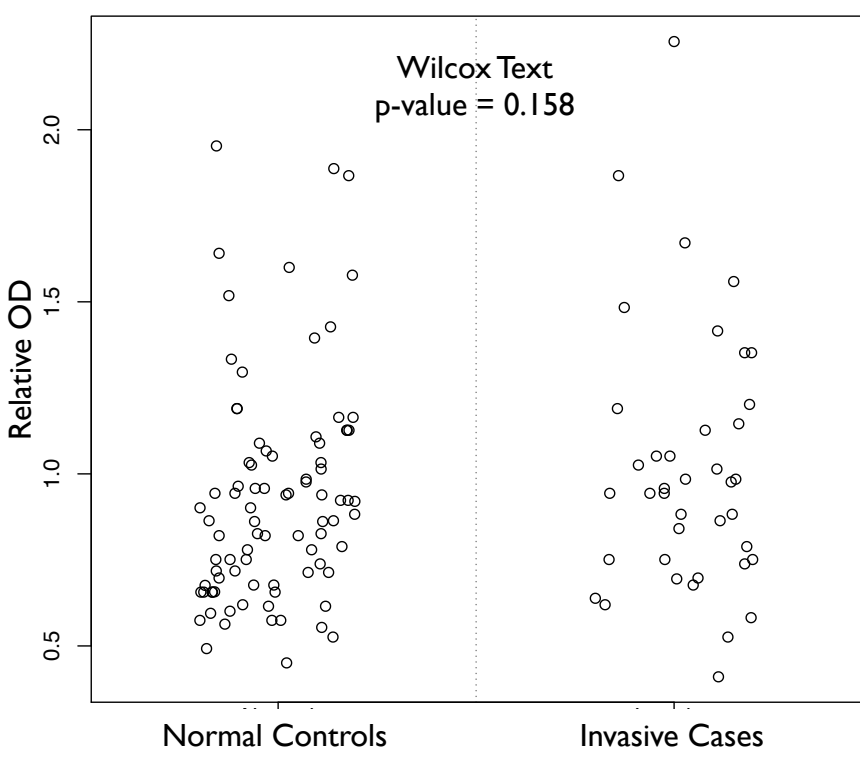**SPPI (Osteopontin)**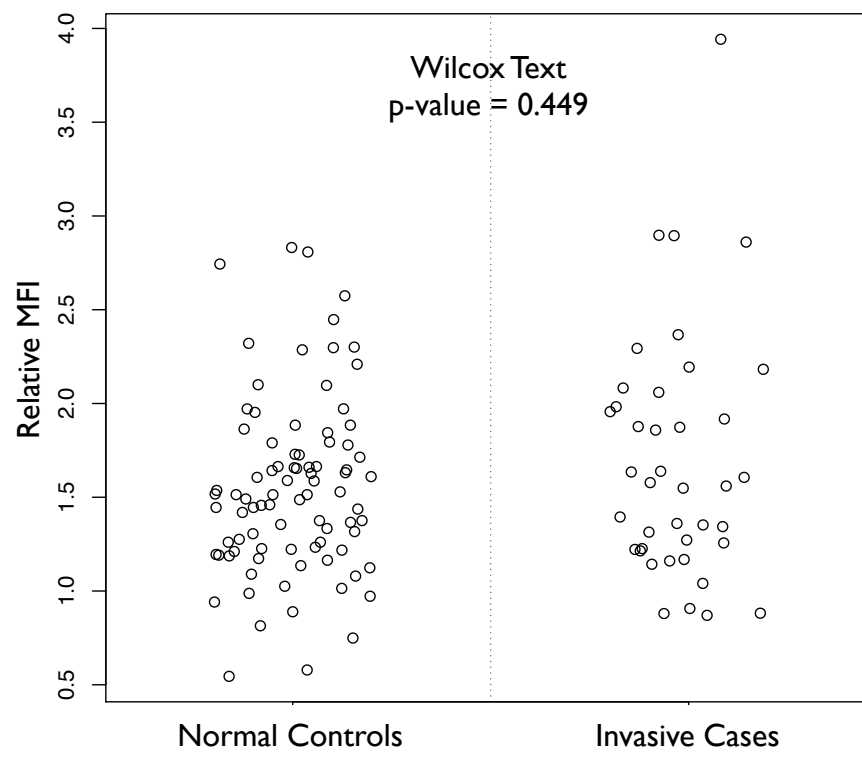**WFDC2 (HE4)**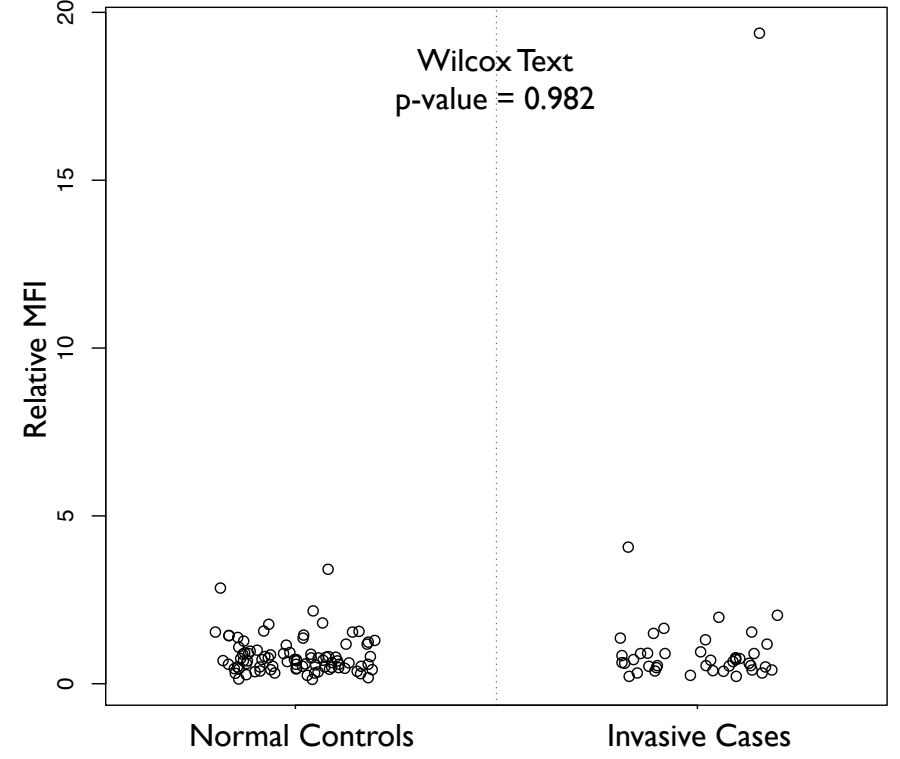**miR-135b**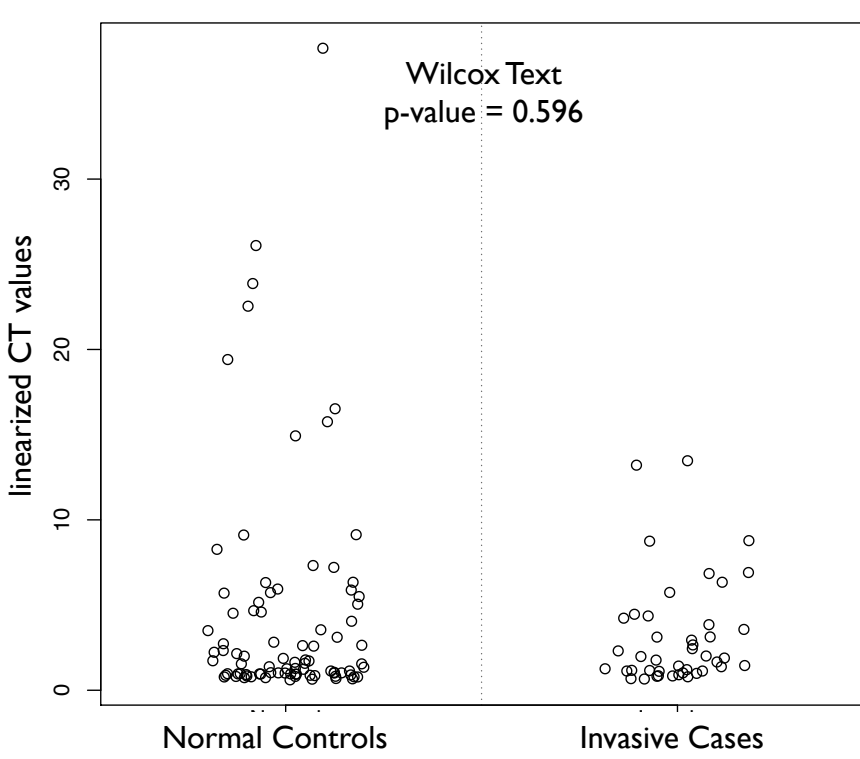**anti-TP53**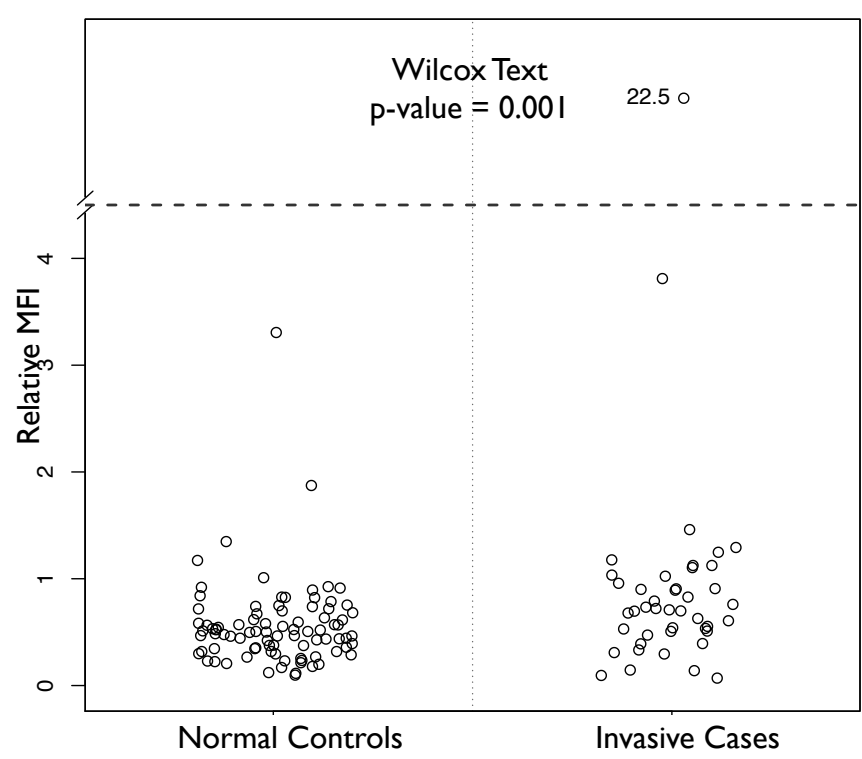**CA125**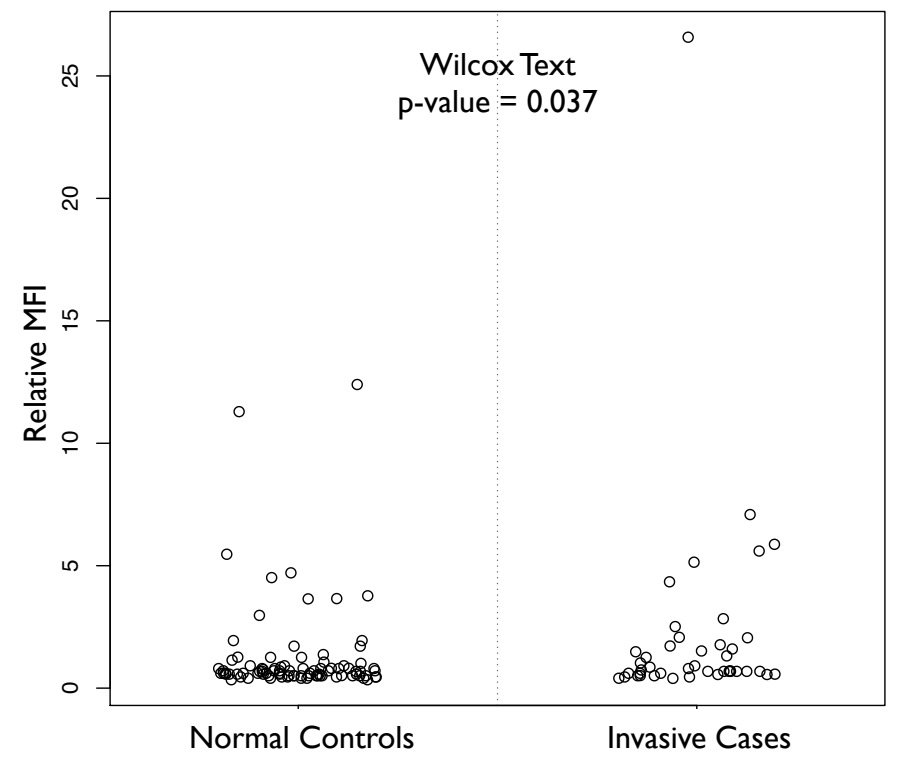

Supplement: pone.0142911.s002.pdf [file pone.0142911.s002.pdf]
