# Supplementary material for: Evaluating Serum Markers for Hormone Receptor-Negative Breast Cancer
Source: PubMed Central journal article supplement (PMC4643893; doi:10.1371/journal.pone.0142911), 2015-11-13

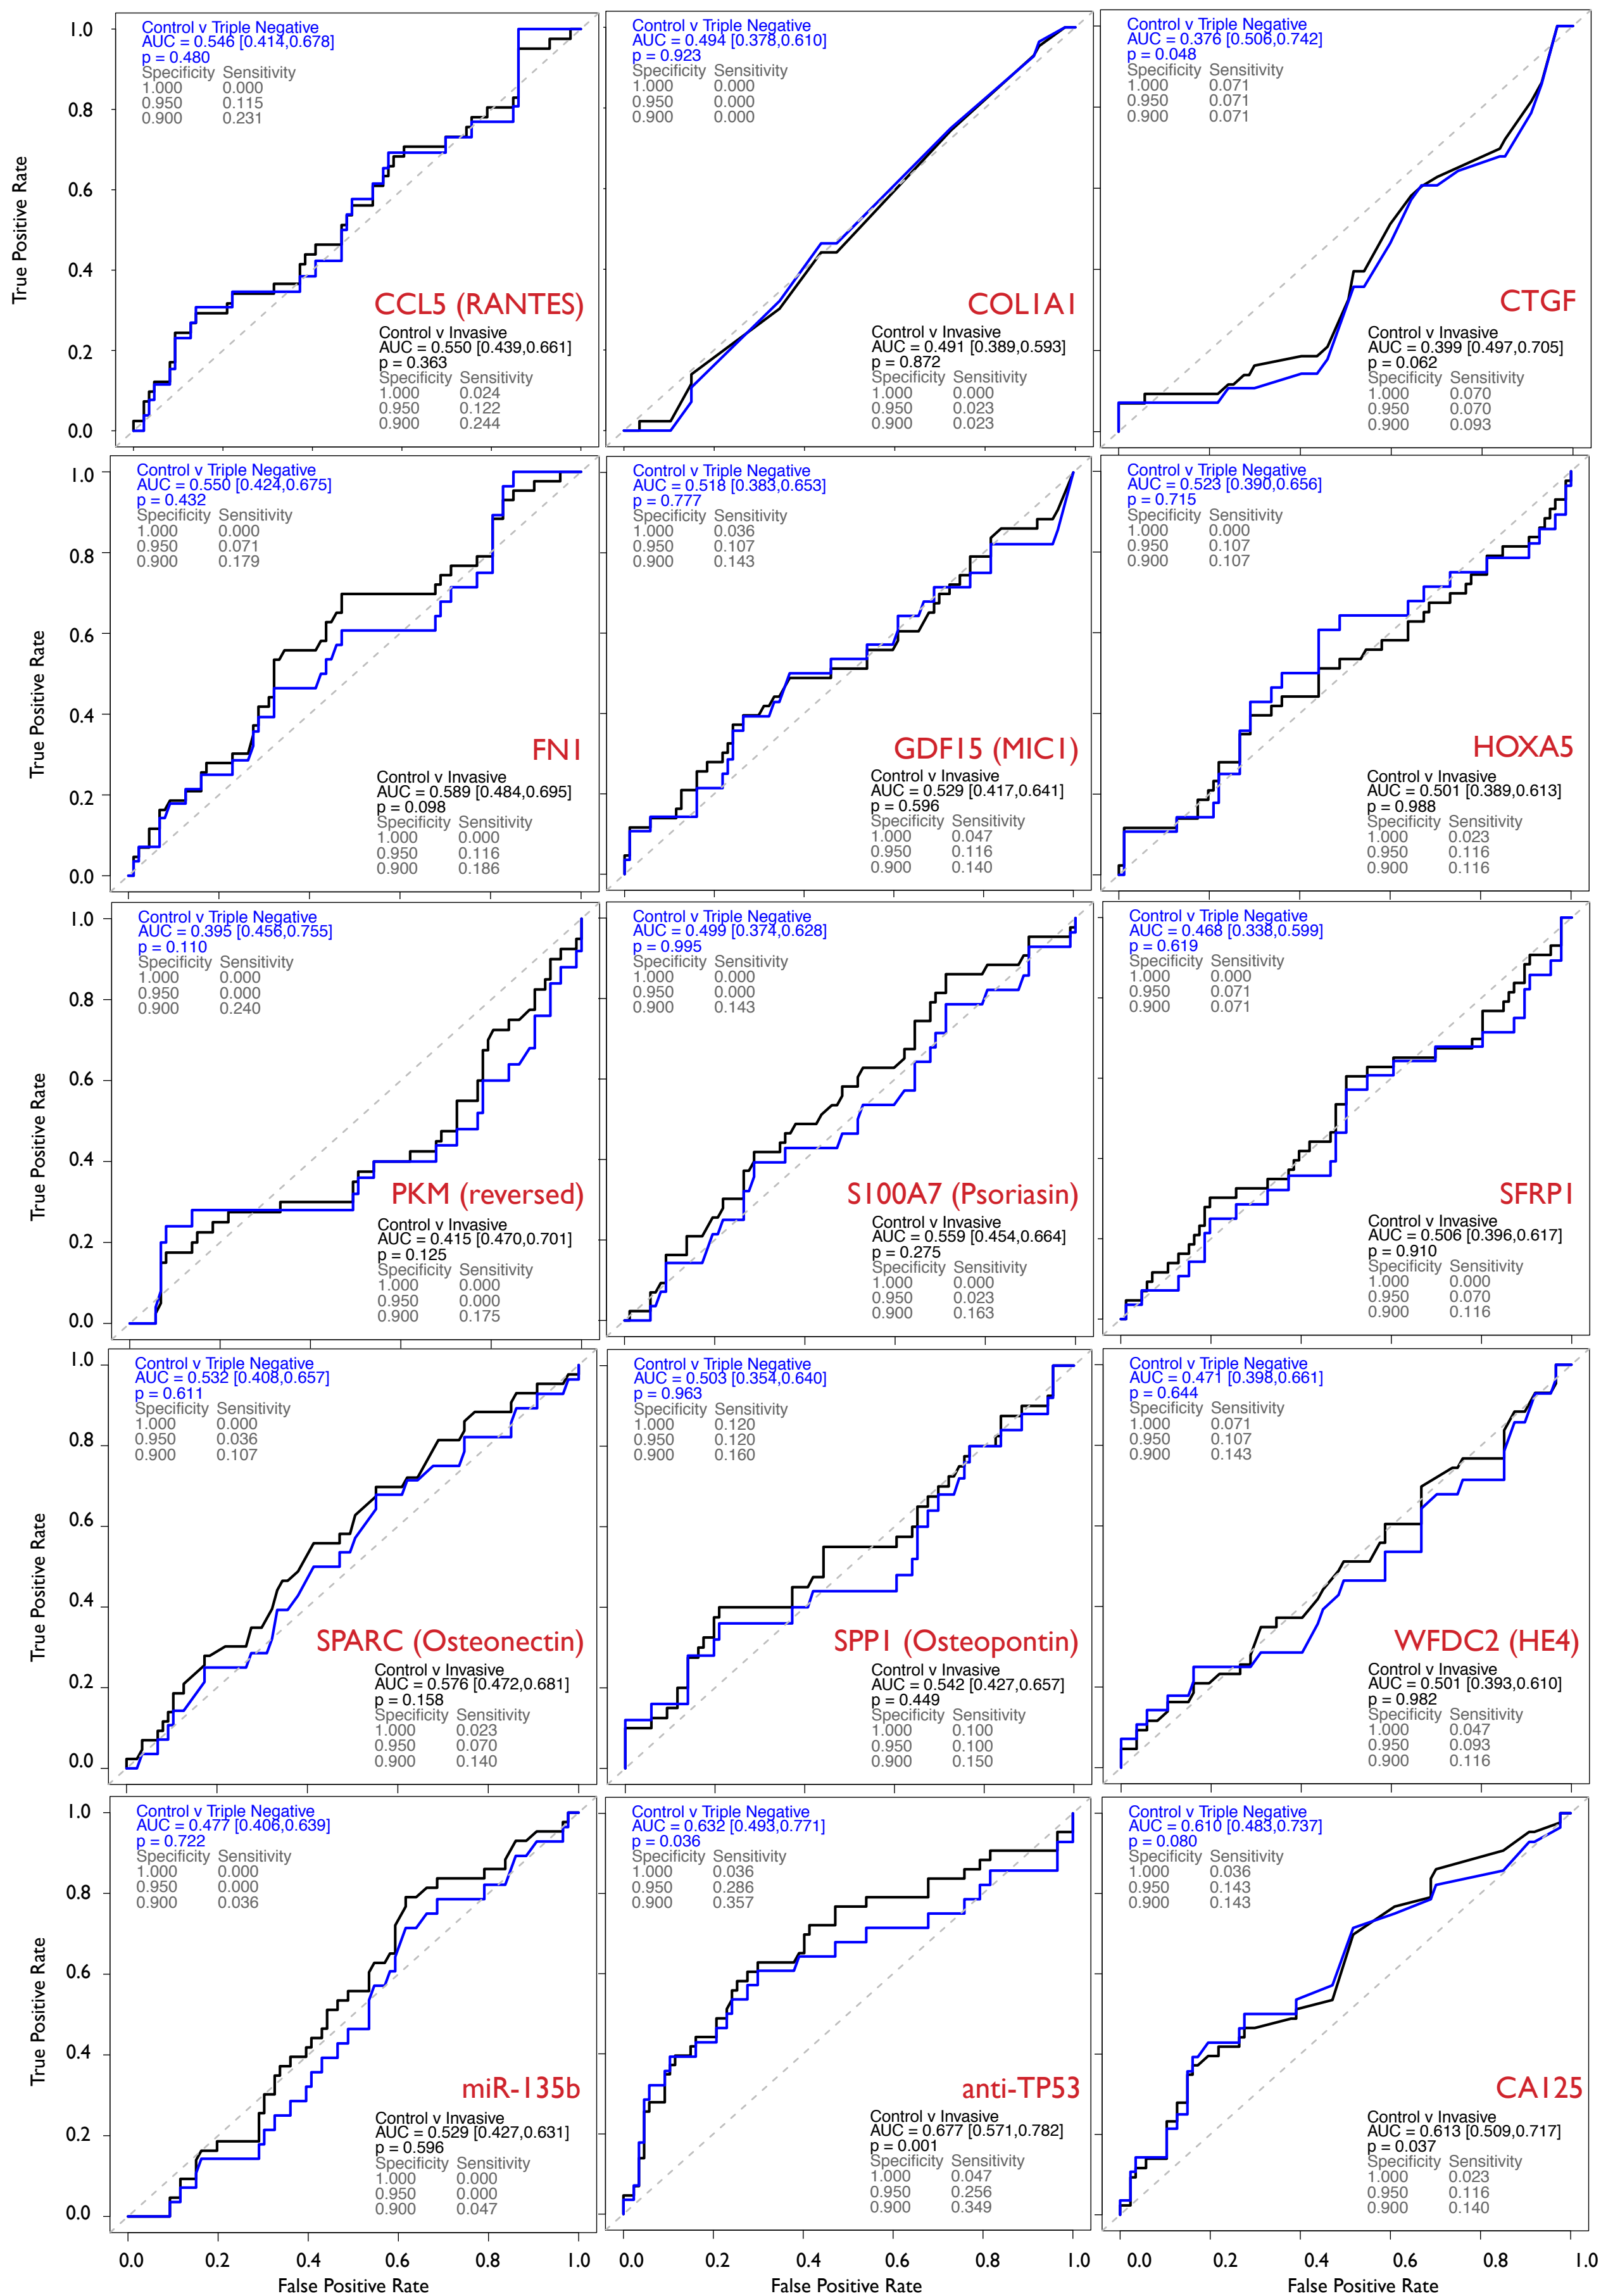

Supplement: pone.0142911.s001.pdf [file pone.0142911.s001.pdf]
