# Supplementary material for: Evaluating Serum Markers for Hormone Receptor-Negative Breast Cancer
Source: PubMed Central journal article supplement (PMC4643893; doi:10.1371/journal.pone.0142911), 2015-11-13
Supplement: pone.0142911.s003.pdf [file pone.0142911.s003.pdf]

## $\alpha$ -TP53 adjusted for time in freezer

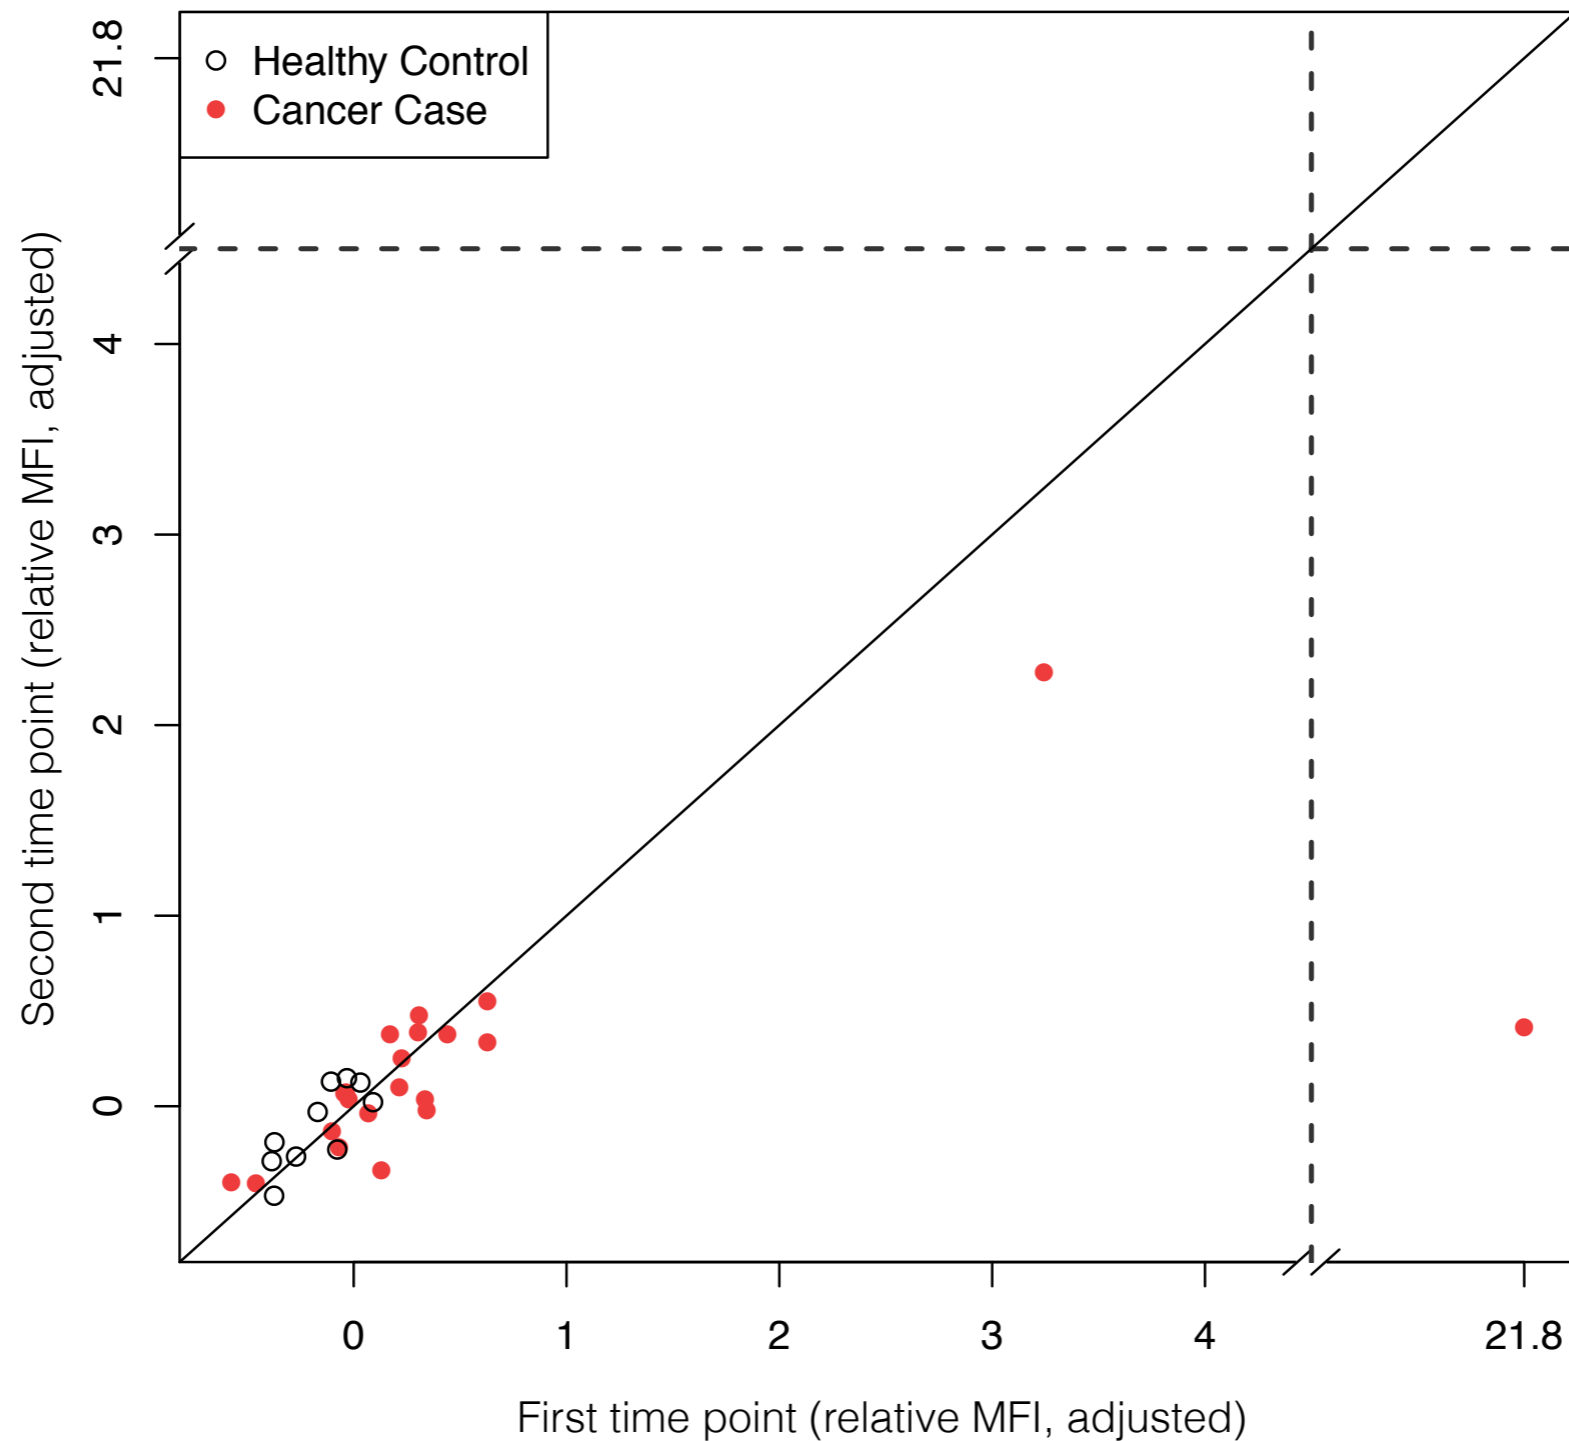

**Supplemental Figure 3** – Anti-TP53 expression and time of storage. When adjusted for the time each serum was stored in the freezer, anti-TP53 values of the first draw (diagnostic for patients) and the second draw (post-therapy for patients) from each individual correlated ( $p < 0.005$  for cases and  $p = 0.029$  for controls).
