# Supplementary material for: Evaluating Serum Markers for Hormone Receptor-Negative Breast Cancer
Source: PubMed Central journal article supplement (PMC4643893; doi:10.1371/journal.pone.0142911), 2015-11-13
Supplement: pone.0142911.s004.pdf [file pone.0142911.s004.pdf]

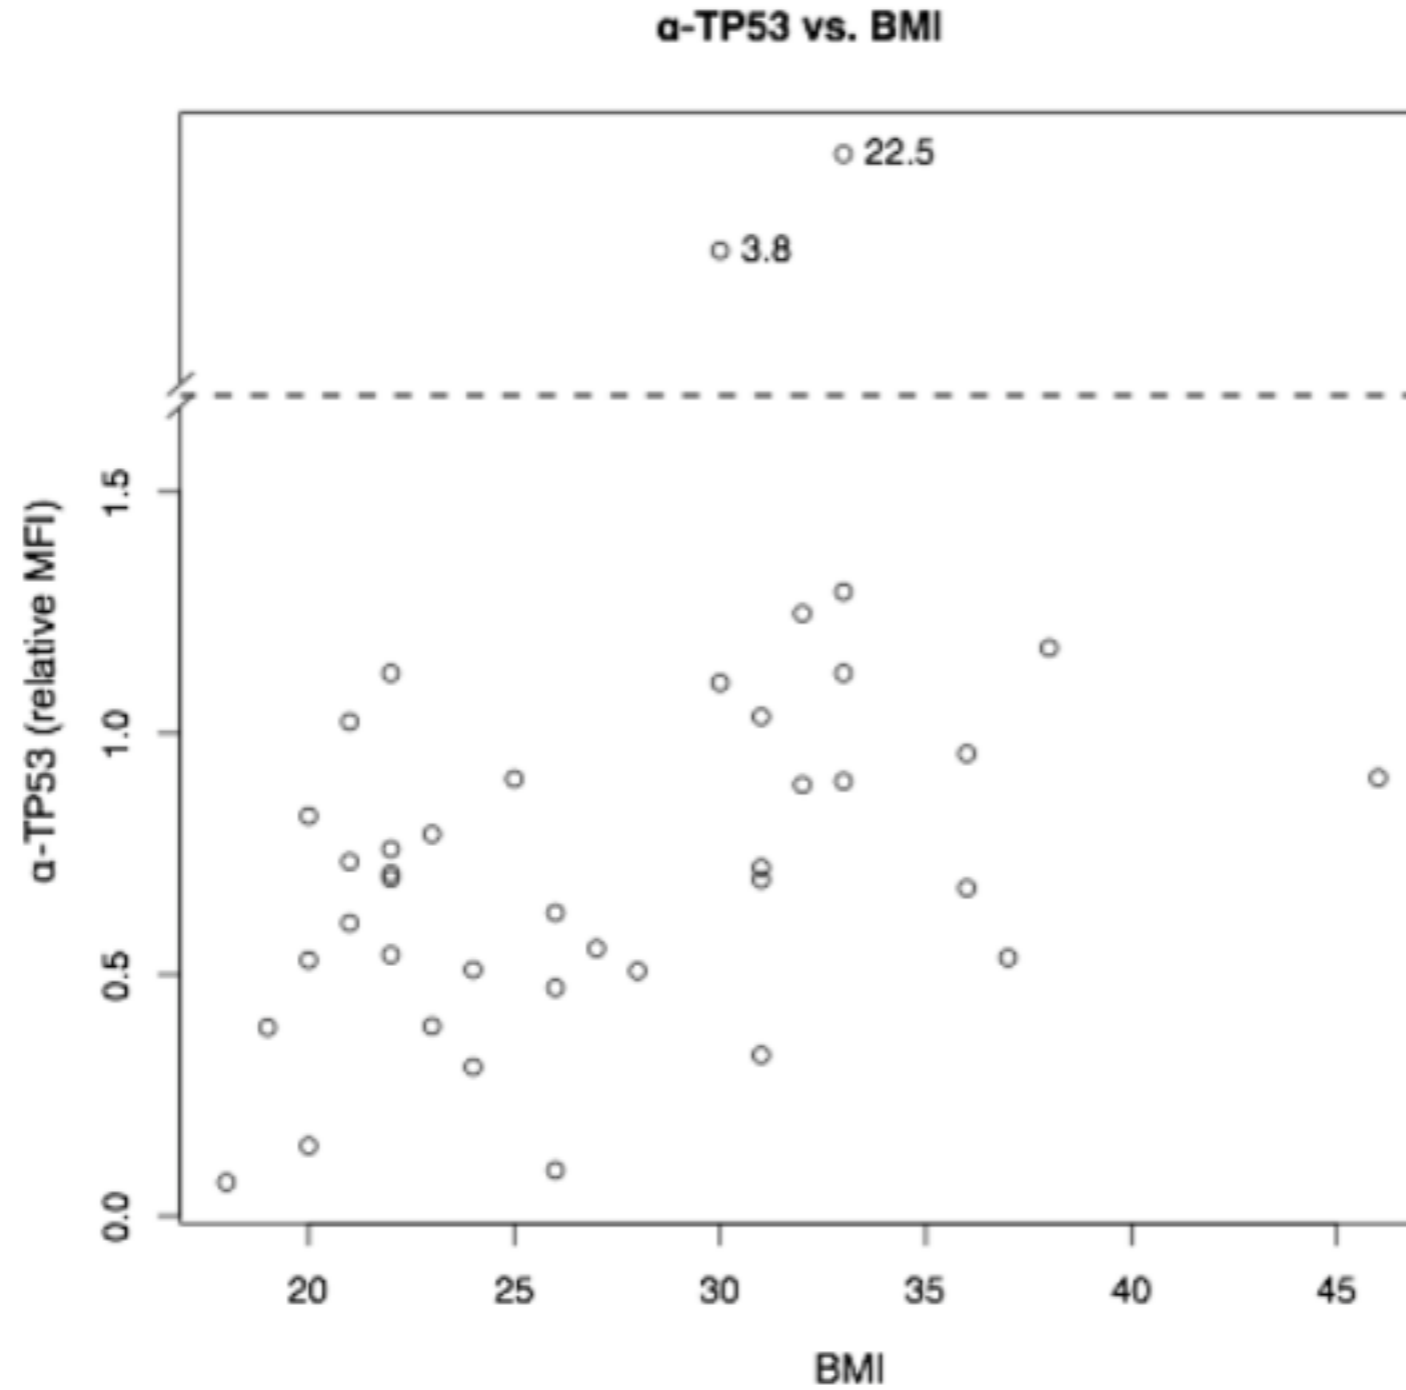

**Supplemental Figure 4** – Correlation between anti-TP53 expression and body-mass-index (BMI). As depicted in the graph, there is a weak correlation (Kendal correlation statistic= 0.317; p=0.005) between anti-TP53 expression and BMI.
