# Supplementary material for: Evaluating Serum Markers for Hormone Receptor-Negative Breast Cancer
Source: PubMed Central journal article supplement (PMC4643893; doi:10.1371/journal.pone.0142911), 2015-11-13
Supplement: pone.0142911.s007.pdf [file pone.0142911.s007.pdf]

**S3 Table** – Selection of 15 analytes; Sensitivity and specificity as serum markers

|           | Selection Criterion | 43 HRN cases and 87 controls    |                                |                                | 28 TN cases and 87 controls     |                                |                                |
|-----------|---------------------|---------------------------------|--------------------------------|--------------------------------|---------------------------------|--------------------------------|--------------------------------|
|           |                     | Sensitivity at 100% specificity | Sensitivity at 95% specificity | Sensitivity at 90% specificity | Sensitivity at 100% specificity | Sensitivity at 95% specificity | Sensitivity at 90% specificity |
| CA125     | 1                   | 2.3%                            | 11.6%                          | 14.0%                          | 3.6%                            | 14.3%                          | 14.3%                          |
| GDF15     | 1                   | 4.7%                            | 11.6%                          | 14.0%                          | 3.6%                            | 10.7%                          | 14.3%                          |
| PKM       | 1                   | 0.0%                            | 0.0%                           | 17.5%                          | 0.0%                            | 0.0%                           | 24.0%                          |
| SPARC     | 1                   | 2.3%                            | 7.0%                           | 14.0%                          | 0.0%                            | 3.6%                           | 10.7%                          |
| WFDC2     | 1                   | 4.7%                            | 9.3%                           | 11.6%                          | 7.1%                            | 10.7%                          | 14.3%                          |
| COL1A1    | 2                   | 0.0%                            | 2.3%                           | 2.3%                           | 0.0%                            | 0.0%                           | 0.0%                           |
| CTGF      | 2                   | 7.0%                            | 7.0%                           | 9.3%                           | 7.1%                            | 7.1%                           | 7.1%                           |
| FN1       | 2                   | 0.0%                            | 11.6%                          | 18.6%                          | 0.0%                            | 7.1%                           | 17.9%                          |
| S100A7    | 2                   | 0.0%                            | 2.3%                           | 16.3%                          | 0.0%                            | 0.0%                           | 14.3%                          |
| SPP1      | 2                   | 10.0%                           | 10.0%                          | 15.0%                          | 12.0%                           | 12.0%                          | 16.0%                          |
| CCL5      | 3                   | 2.4%                            | 12.2%                          | 24.4%                          | 0.0%                            | 11.5%                          | 23.1%                          |
| miR-135b  | 3                   | 0.0%                            | 0.0%                           | 4.7%                           | 0.0%                            | 0.0%                           | 3.6%                           |
| Anti-TP53 | 3                   | 4.7%                            | 25.6%                          | 34.9%                          | 3.6%                            | 28.6%                          | 35.7%                          |
| HOXA5     | 4                   | 2.3%                            | 11.6%                          | 11.6%                          | 0.0%                            | 10.7%                          | 10.7%                          |
| SFRP1     | 4                   | 0.0%                            | 7.0%                           | 11.6%                          | 0.0%                            | 7.1%                           | 7.1%                           |

Data from 43 cases and 87 controls. Marker selection criteria: (1) serum marker potential in high-grade serous ovarian cancer and involvement in breast cancer; (2) transcript involved in breast cancer; (3) association with poor breast cancer outcome; (4) protein decreased in breast cancer tissue compared to normal breast. Changes in the TN subset relative to the full HRN set are indicated with color shading (green=better, red=worse).
