# Supplementary material for: Evaluating Serum Markers for Hormone Receptor-Negative Breast Cancer
Source: PubMed Central journal article supplement (PMC4643893; doi:10.1371/journal.pone.0142911), 2015-11-13
Supplement: pone.0142911.s008.pdf [file pone.0142911.s008.pdf]

**S4 Table – Bootstrap Analysis for the 43 HRN cases**

| Analyte Panel                                                                                       | Type of Statistic              | Observed Statistics |               | Bootstrap Analyses (10,000 iterations) |                      |           |
|-----------------------------------------------------------------------------------------------------|--------------------------------|---------------------|---------------|----------------------------------------|----------------------|-----------|
|                                                                                                     |                                | Anti-TP53 Alone     | Analyte Panel | Statistics                             | Percentiles          | P-values  |
|                                                                                                     |                                |                     |               | mean (sd)                              | estimate [95% CI]    | (2 sided) |
| Anti-TP53 with FN1 and CTGF (selected using AIC)                                                    | AUC                            | 0.66                | 0.65          | 0.67 (0.035)                           | 0.726 [0.717, 0.735] | 0.548     |
|                                                                                                     | Sensitivity at 95% Specificity | 27.5%               | 27.5%         | 0.20 (0.071)                           | 0.068 [0.063, 0.073] | 0.136     |
|                                                                                                     | Sensitivity at 90% Specificity | 37.5%               | 27.5%         | 0.28 (0.081)                           | 0.474 [0.464, 0.484] | 0.948     |
| Anti-TP53 with SPP1, FN1, CCL5 and GDF15 (selected based on sensitivity at 95% and 90% specificity) | AUC                            | 0.66                | 0.63          | 0.65 (0.030)                           | 0.722 [0.713, 0.730] | 0.557     |
|                                                                                                     | Sensitivity at 95% Specificity | 27.5%               | 25%           | 0.16 (0.060)                           | 0.056 [0.051, 0.060] | 0.111     |
|                                                                                                     | Sensitivity at 90% Specificity | 37.5%               | 27.5%         | 0.24 (0.068)                           | 0.243 [0.234, 0.251] | 0.486     |

The panels were fit and all statistics were calculated using the 43 cases and 87 controls for which data from all 5 markers were available. AIC: Akaike's Information Criterion. AUC: Area under the curve.
