# Supplementary material for: Evaluating Serum Markers for Hormone Receptor-Negative Breast Cancer
Source: PubMed Central journal article supplement (PMC4643893; doi:10.1371/journal.pone.0142911), 2015-11-13
Supplement: pone.0142911.s009.pdf [file pone.0142911.s009.pdf]

**S5 Table – Bootstrap Analysis for the 28 TN cases**

| Analyte Panel                                                                                   | Type of Statistic              | Observed Statistics |               | Bootstrap Analyses (10,000 iterations) |                      |           |
|-------------------------------------------------------------------------------------------------|--------------------------------|---------------------|---------------|----------------------------------------|----------------------|-----------|
|                                                                                                 |                                | Anti-TP53 Alone     | Analyte Panel | Statistics                             | Percentiles          | P-values  |
|                                                                                                 |                                |                     |               | mean (sd)                              | estimate [95% CI]    | (2 sided) |
| Anti-TP53 with FN1, CTGF and WFDC2 (Selected using the AIC criterion)                           | AUC                            | 0.61                | 0.65          | 0.71 (0.055)                           | 0.828 [0.820, 0.835] | 0.345     |
|                                                                                                 | Sensitivity at 95% Specificity | 30.8%               | 30.8%         | 0.23 (0.093)                           | 0.142 [0.135, 0.149] | 0.283     |
|                                                                                                 | Sensitivity at 90% Specificity | 38.5%               | 34.6%         | 0.33 (0.1)                             | 0.381 [0.372, 0.391] | 0.762     |
| Anti-TP53 with FN1, CA125, and WFDC2 (selected based on sensitivity at 95% and 90% specificity) | AUC                            | 0.61                | 0.63          | 0.67 (0.039)                           | 0.872 [0.865, 0.878] | 0.256     |
|                                                                                                 | Sensitivity at 95% Specificity | 30.8%               | 26.9%         | 0.18 (0.076)                           | 0.091 [0.086, 0.097] | 0.183     |
|                                                                                                 | Sensitivity at 90% Specificity | 38.5%               | 30.8%         | 0.27 (0.084)                           | 0.247 [0.239, 0.256] | 0.495     |

The panels were fit and all statistics were calculated using the 28 triple-negative (TN) cases and 87 controls for which data from all 5 markers were available. AIC: Akaike's Information Criterion. AUC: Area under the curve.
