# Supplementary material for: Evaluating Serum Markers for Hormone Receptor-Negative Breast Cancer
Source: PubMed Central journal article supplement (PMC4643893; doi:10.1371/journal.pone.0142911), 2015-11-13
Supplement: pone.0142911.s010.pdf [file pone.0142911.s010.pdf]

**S6 Table – Anti-TP53 in diagnostic (D) and post-therapy (P) draws**

| Patient # | Kind    | Interval D to P | Anti-TP53 (D) | Anti-TP53 (P) | P / D |
|-----------|---------|-----------------|---------------|---------------|-------|
| 1         | Cancer  | 76w 4d          | 0.91          | 0.50          | 0.55  |
| 3         | Cancer  | 103w 0d         | 0.07          | 0.11          | 1.52  |
| 4         | Cancer  | 48w 4d          | 1.25          | 1.11          | 0.89  |
| 5         | Cancer  | 81w 4d          | 22.45         | 0.92          | 0.04  |
| 10        | Cancer  | 56w 0d          | 0.15          | 0.13          | 0.87  |
| 11        | Cancer  | 57w 2d          | 1.03          | 0.90          | 0.87  |
| 12        | Cancer  | 118w 1d         | 0.90          | 0.91          | 1.01  |
| 14        | Cancer  | 109w 0d         | 0.55          | 0.52          | 0.93  |
| 16        | Cancer  | 25w 5d          | 0.54          | 0.62          | 1.15  |
| 17        | Cancer  | 53w 4d          | 0.51          | 0.29          | 0.57  |
| 20        | Cancer  | 60w 1d          | 0.70          | 0.15          | 0.22  |
| 21        | Cancer  | 51w 1d          | 3.81          | 2.78          | 0.73  |
| 25        | Cancer  | 48w 1d          | 0.53          | 0.53          | 1.00  |
| 27        | Cancer  | 61w 3d          | 0.72          | 0.85          | 1.17  |
| 29        | Cancer  | 48w 3d          | 0.89          | 0.47          | 0.52  |
| 30        | Cancer  | 80w 3d          | 1.18          | 0.78          | 0.66  |
| 31        | Cancer  | 52w 1d          | 0.76          | 0.58          | 0.76  |
| 32        | Cancer  | 70w 1d          | 0.68          | 0.48          | 0.71  |
| 34        | Cancer  | 52w 0d          | 0.73          | 0.69          | 0.94  |
| 35        | Cancer  | 53w 5d          | 0.39          | 0.29          | 0.74  |
| 36        | Cancer  | 54w 6d          | 0.79          | 0.80          | 1.01  |
| 44        | Control | 107w 3d         | 0.27          | 0.03          | 0.11  |
| 52        | Control | 114w 4d         | 0.17          | 0.20          | 1.19  |
| 53        | Control | 83w 4d          | 0.57          | 0.55          | 0.97  |
| 57        | Control | 59w 2d          | 0.30          | 0.22          | 0.76  |
| 77        | Control | 53w 6d          | 0.38          | 0.44          | 1.18  |
| 90        | Control | 118w 2d         | 0.22          | 0.16          | 0.73  |
| 99        | Control | 118w 4d         | 0.51          | 0.53          | 1.04  |
| 104       | Control | 107w 2d         | 0.47          | 0.56          | 1.20  |
| 124       | Control | 172w 6d         | 0.54          | 0.16          | 0.30  |
| 131       | Control | 16w 6d          | 0.65          | 0.56          | 0.86  |

Comparison of two blood draws from the same cancer patient or healthy control. For cancers, D is the diagnostic draw and P is the post-therapeutic draw. For the controls, D and P are two blood draws with intervals similar to those for the 21 cancer patients.
