# Supplementary material for: Evaluating Serum Markers for Hormone Receptor-Negative Breast Cancer
Source: PubMed Central journal article supplement (PMC4643893; doi:10.1371/journal.pone.0142911), 2015-11-13
Supplement: pone.0142911.s011.pdf [file pone.0142911.s011.pdf]

**S7 Table – Correlation of Patient and Disease Characteristics with Anti-TP53**

| <b>Covariate</b>              | <b>Kendall Correlation Statistic</b> | <b>p-Value</b> |
|-------------------------------|--------------------------------------|----------------|
| Days from Draw to Surgery     | 0.057                                | 0.603          |
| BI-RADS                       | -0.041                               | 0.738          |
| Breast Density                | -0.210                               | 0.104          |
| Death                         | -0.050                               | 0.695          |
| Recurrence                    | -0.005                               | 0.968          |
| No ovaries                    | 0.040                                | 0.755          |
| Triple-negative cancer        | -0.097                               | 0.445          |
| Stage                         | -0.048                               | 0.678          |
| Positive Lymph Nodes          | -0.128                               | 0.327          |
| Metastases                    | 0.138                                | 0.290          |
| Neoadjuvant Treatment         | -0.139                               | 0.277          |
| Age at Diagnosis              | -0.054                               | 0.615          |
| Age at Menarche               | -0.027                               | 0.826          |
| Age at Menopause              | 0.080                                | 0.511          |
| Tumor size                    | 0.029                                | 0.796          |
| BMI                           | 0.317                                | 0.005          |
| Parity                        | 0.066                                | 0.559          |
| Children                      | 0.015                                | 0.894          |
| Smoking (Pack years)          | 0.058                                | 0.625          |
| Alcohol intake (g Alc per yr) | -0.076                               | 0.502          |
| Previous Cancer               | -0.150                               | 0.227          |
